# Supplementary material for: Rapid and Simultaneous Prediction of Eight Diesel Quality Parameters through ATR-FTIR Analysis
Source: Hindawi journal article supplement (doi:10.1155/2018/1795624), 2018-01-01
Supplement: f1 [file 1795624.f1.pdf]

## SUPPLEMENTARY MATERIAL

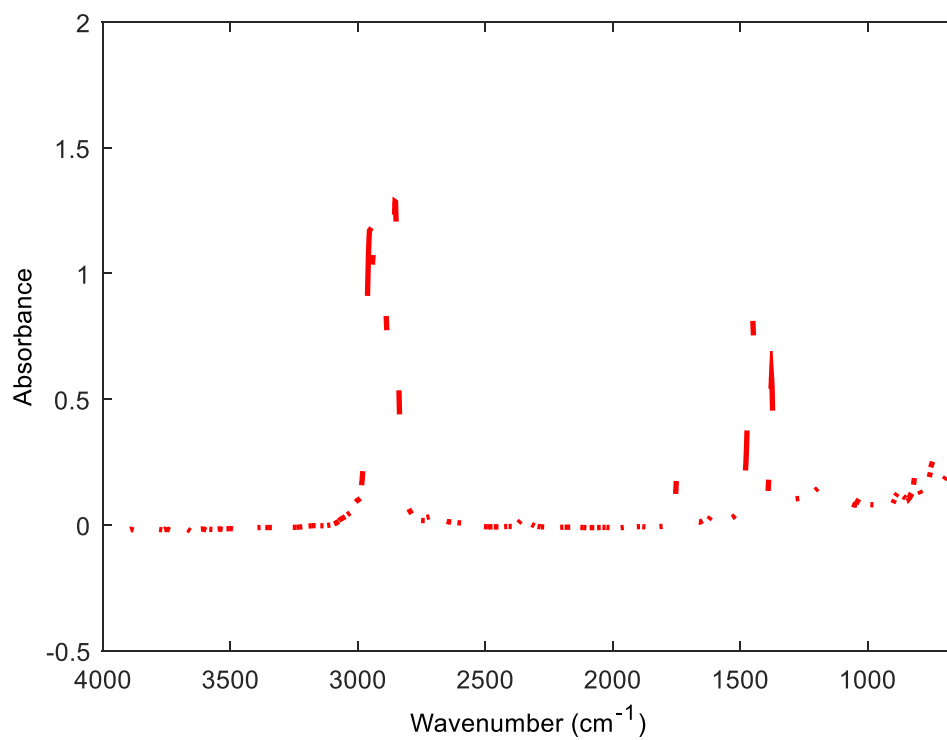

**Figure 1.** Spectra variables of GA-PLS model for density prediction.

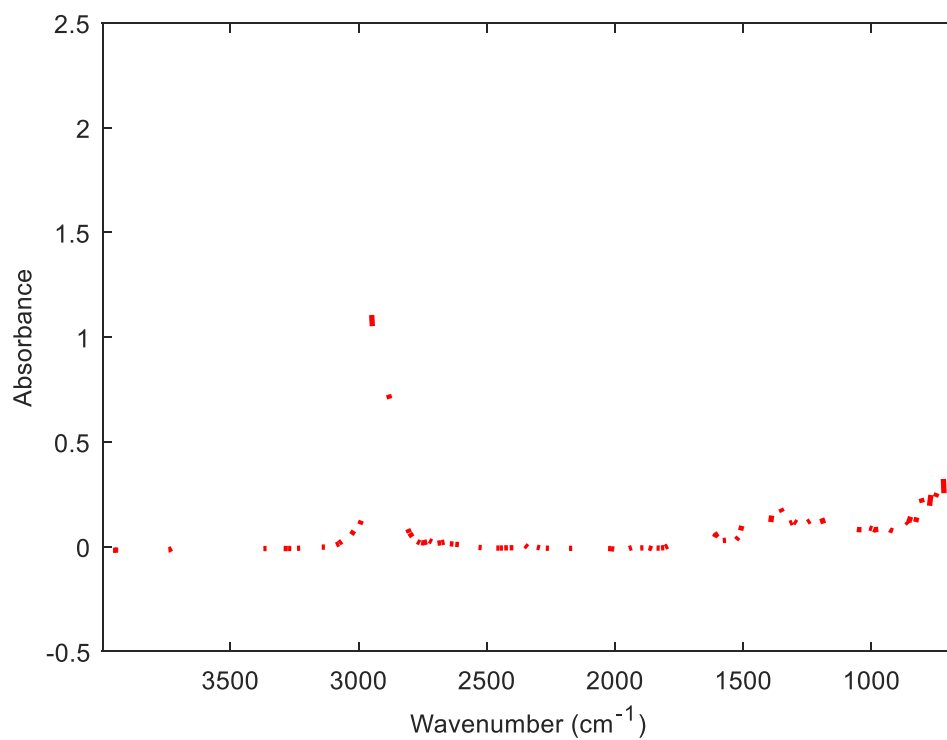

**Figure 2.** Spectra variables of GA-PLS model for flash point prediction.

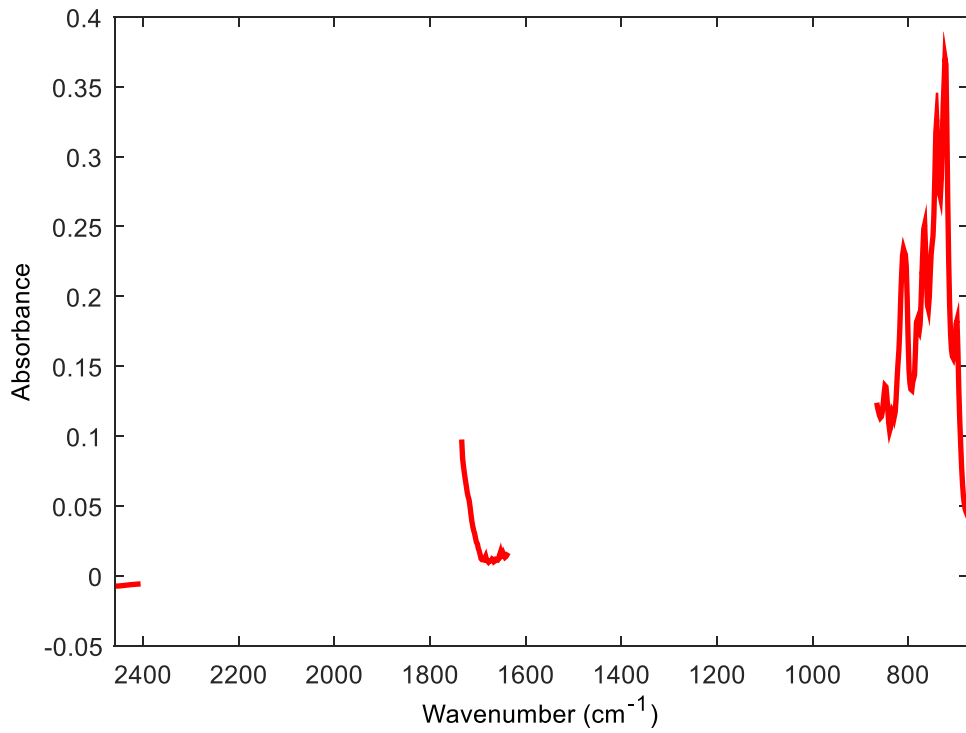

**Figure 3.** Spectra variables of FiPLS model for sulfur content prediction.

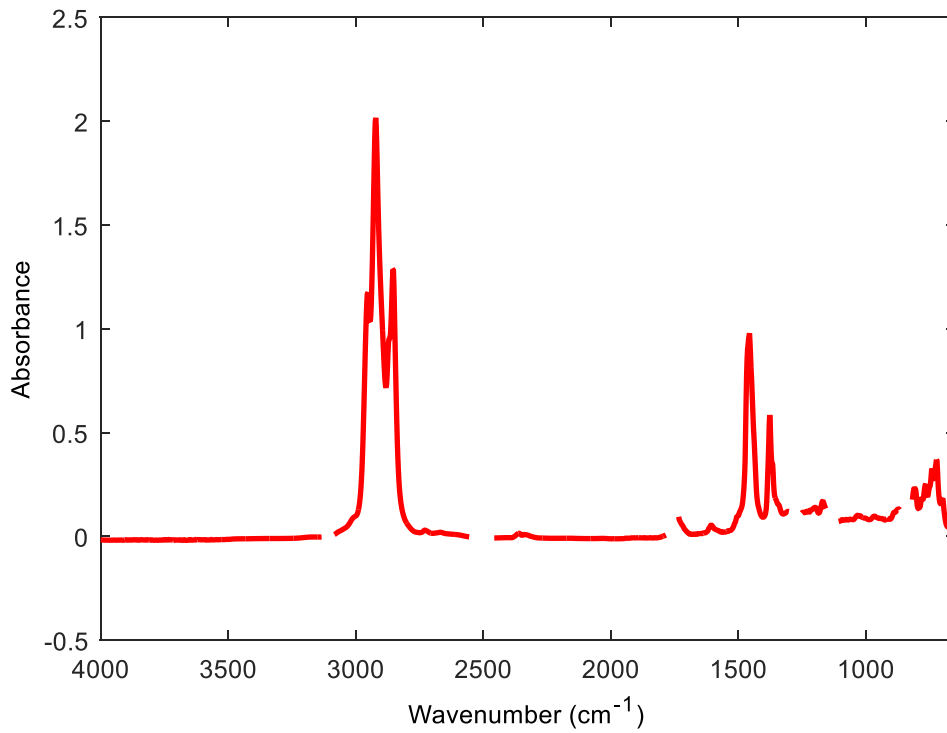

**Figure 4.** Spectra variables of BiPLS model for T10 prediction.

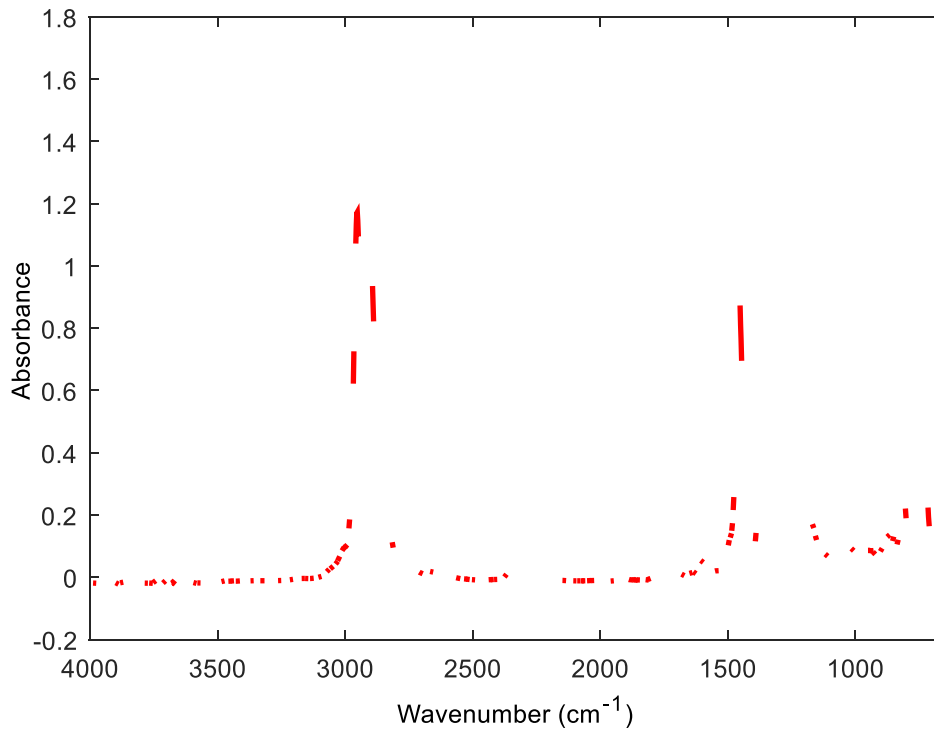

**Figure 5.** Spectra variables of GA-PLS model for T50 prediction.

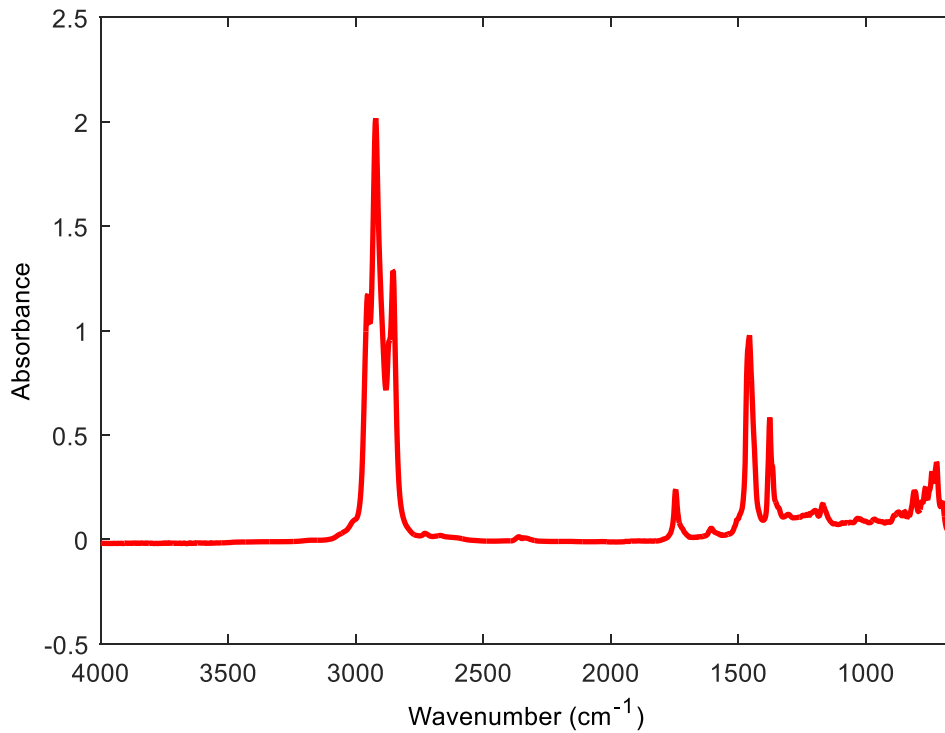

**Figure 6.** Spectra variables of PLS model for T85 prediction

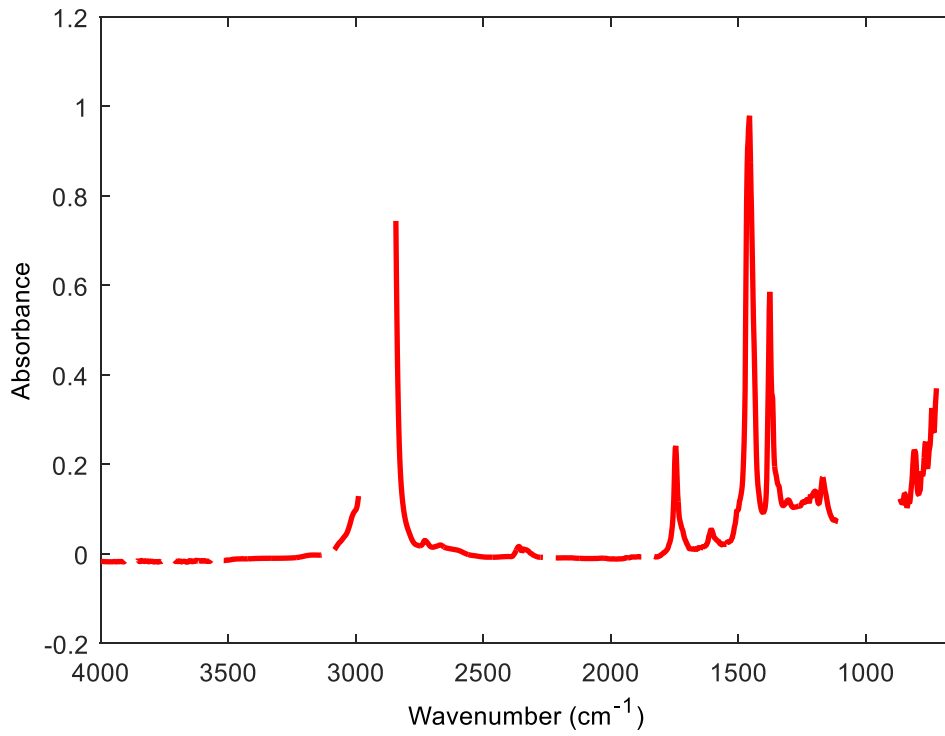

**Figure 7.** Spectra variables of BiPLS model for cetane index prediction.

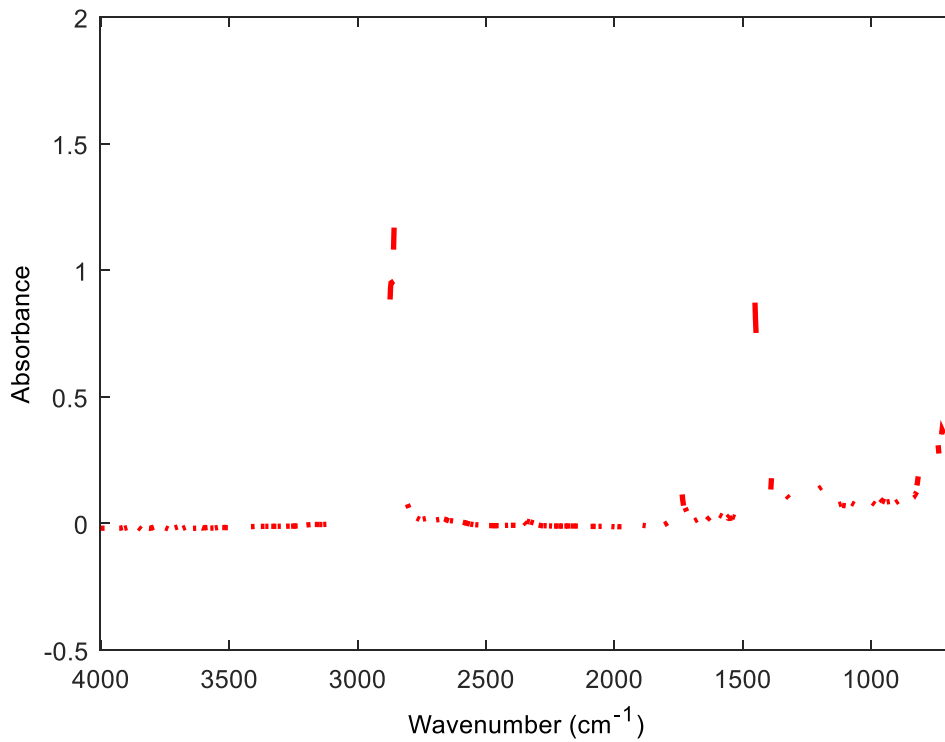

**Figure 8.** Spectra variables of GA-PLS model for biodiesel content prediction.
